# Supplementary material for: Control of mitotic chromosome condensation by the fission yeast transcription factor Zas1
Source: PubMed Central journal article supplement (PMC6028546; doi:10.1083/jcb.201711097), 2018-07-02
Supplement: JCB_201711097_sm.pdf [file JCB_201711097_sm.pdf]

Supplemental material

Schiklenk et al., <https://doi.org/10.1083/jcb.201711097>

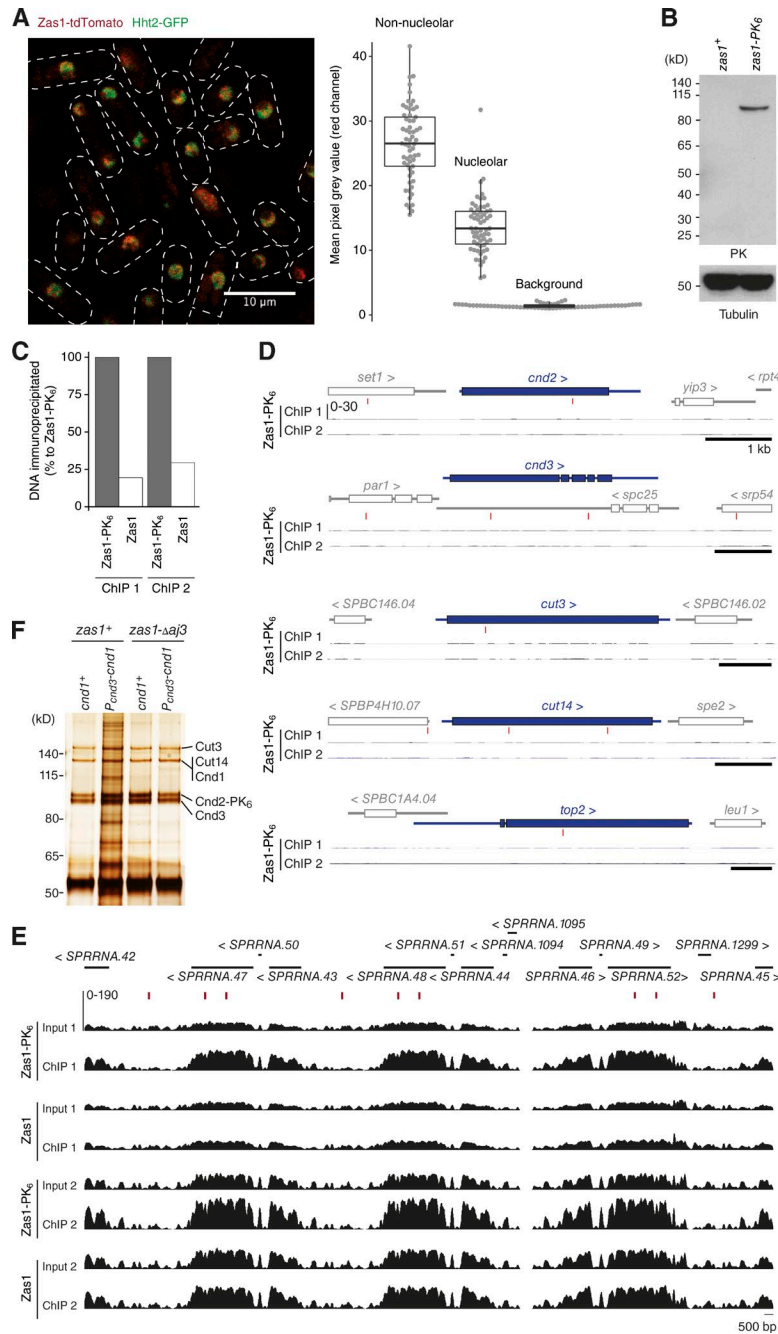

Figure S1. **Characterization of Zasl binding to chromosomes.** (A) Confocal section of asynchronous cells that coexpress Hht2-GFP and Zasl1-tdTomato (strain C5182). The graph shows the mean Zasl1-tdTomato fluorescent signal intensities in nonnucleolar, nucleolar, and background regions (bar, median; boxes, upper and lower quartiles; whiskers, minima and maxima with 1.5 interquartile range outlier rule;  $n = 61$  cells). (B) Immunoblot of whole-cell extracts from yeast strains (C28, C4120) expressing untagged or PK<sub>6</sub>-tagged versions of Zasl1. Immunoblotting against  $\alpha$ -tubulin serves as loading control. (C) Total DNA levels coimmunoprecipitated with Zasl1 in relation to Zasl1-PK<sub>6</sub> from strains in B in two independent ChIP experiments determined by fluorometric quantitation (Qubit dsDNA HS assay). (D) Sequencing read profiles at the *cnd2*, *cnd3*, *cut3*, *cut14* condensin, and *top2* topo II gene loci of ChIP samples from two independent experiments with strains in B. Vertical red lines indicate positions of Zasl1-UASs; black horizontal bar indicates 1 kb. (E) Sequencing read profiles mapped to three rDNA repeat regions of a representative ChIP experiment with strains in B. Red lines indicate the positions of Zasl1-UAS motifs. (F) Condensin complexes were immunoprecipitated from asynchronous cultures using an antibody against ta PK<sub>6</sub> epitope fused to the C terminus of Cnd2 and analyzed by SDS-PAGE and silver staining.

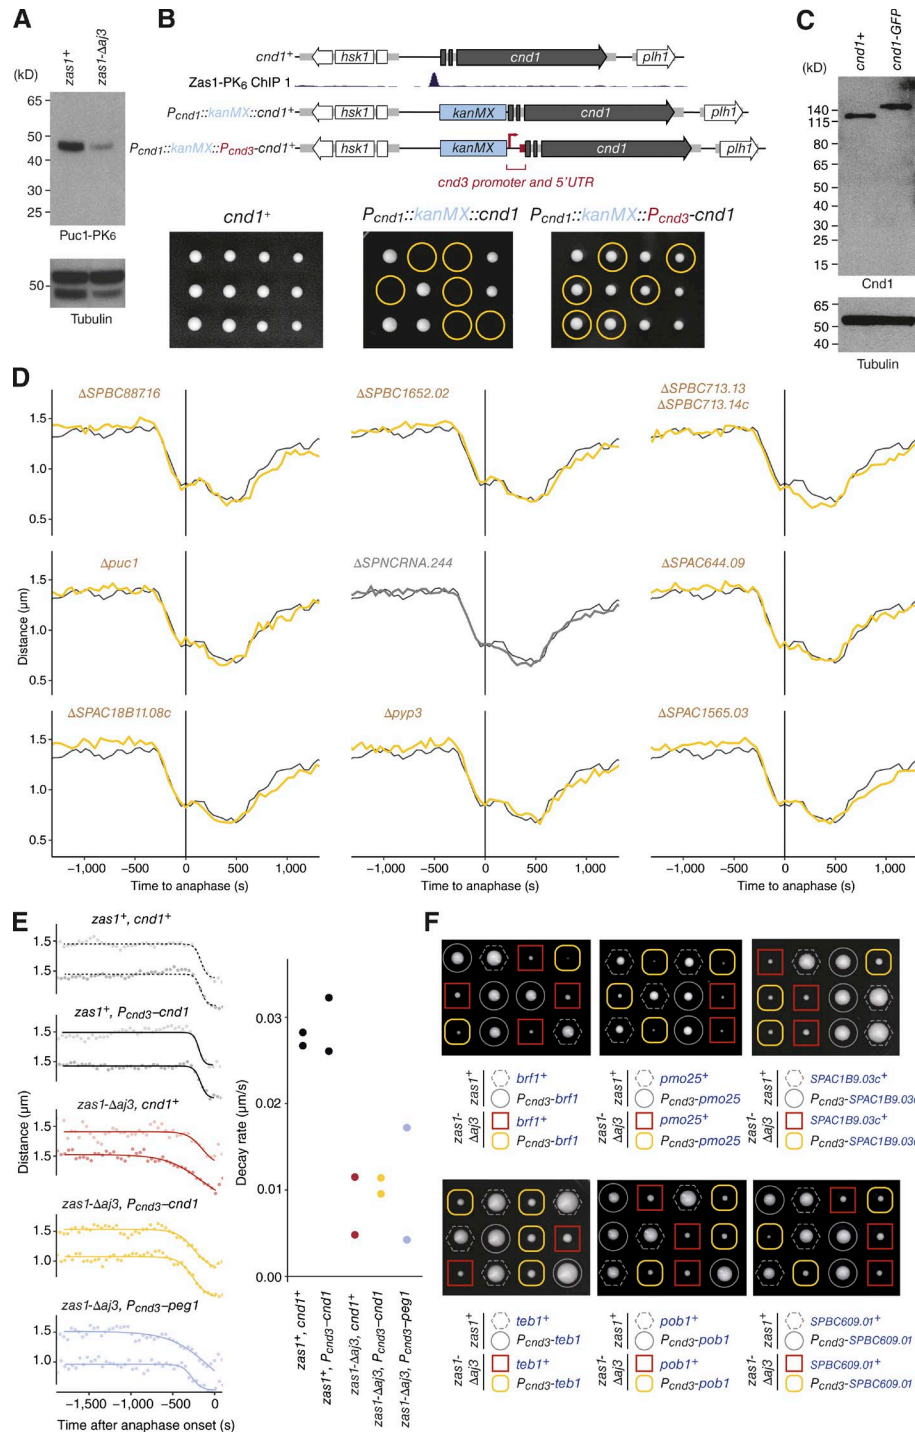

**Figure S2. Characterization of Zasl1 target genes.** (A) Comparison of protein levels by immunoblotting of whole-cell extracts from asynchronous cultures of strains derived from dissection of the same *zas1*<sup>+</sup>/*zas1*- $\Delta$ *aj3* tetrad (C4674) against the PK<sub>6</sub> tag fused to Puc1. Immunoblotting against  $\alpha$ -tubulin serves as loading control. (B) Schematic of the disruption of the endogenous *cnd1* promoter by insertion of the kanMX resistance marker cassette followed by insertion of the *cnd3* promoter between the *cnd1* promoter and the start codon of the *cnd1* ORF. Tetrad analysis of heterozygous *cnd1*<sup>+</sup>/*cnd1*<sup>+</sup>, *P*<sub>*cnd1*</sub> $\Delta$ -*cnd1*/*cnd1*<sup>+</sup>, and *P*<sub>*cnd3*</sub>-*cnd1*/*cnd1*<sup>+</sup> diploid fission yeast strains (C4632, C4648, C4485) after 5 d at 25°C. Circles identify the position of spores bearing the *cnd1*<sup>+</sup>, *P*<sub>*cnd1*</sub> $\Delta$ -*cnd1*, and *P*<sub>*cnd3*</sub>-*cnd1* genes, respectively. (C) Validation of the Cnd1 antibody by blotting of whole-cell extracts from cells expressing untagged or GFP-tagged versions of *cnd1*<sup>+</sup> from their endogenous genomic loci (C28, C4660). (D) Comparison of condensation curves of wild-type (black, C4960, *n* = 149 cells) and  $\Delta$ SPBC887.16 (yellow, C5104, *n* = 99 cells),  $\Delta$ SPBC1652.02 (yellow, C5105, *n* = 177 cells),  $\Delta$ SPBC713.13  $\Delta$ SPBC713.14c (yellow, C5089, *n* = 128 cells),  $\Delta$ SPBC887.16 (yellow, C5104, *n* = 99 cells),  $\Delta$ SPBC1652.02 (yellow, C5105, *n* = 177 cells),  $\Delta$ SPBC713.13  $\Delta$ SPBC713.14c (yellow, C5089, *n* = 128 cells),  $\Delta$ *puc1* (yellow, C5088, *n* = 124),  $\Delta$ SPNCRNA.244 (gray, C5138, *n* = 144 cells),  $\Delta$ SPAC644.09 (yellow, C5109, *n* = 163 cells),  $\Delta$ SPAC18B11.08c (yellow, C5084, *n* = 143 cells),  $\Delta$ *pyp3* (yellow, C5090, *n* = 100 cells), and  $\Delta$ SPAC1565.03 (yellow, C5085, *n* = 136 cells) strains. (E) Sigmoid fits of condensation curves shown in Fig. 5 (E and H) from two independent experiments. The plot shows the decay rates calculated from the two fits for each experiment. (F) Tetrad analysis of a heterozygous *zas1*- $\Delta$ *aj3*/*zas1*<sup>+</sup>, *P*<sub>*cnd3*</sub>-*brf1*/*brf1*<sup>+</sup> (C5094), *P*<sub>*cnd3*</sub>-*SPAC1B9.03c*/*SPAC1B9.03c*<sup>+</sup> (C5077), *P*<sub>*cnd3*</sub>-*teb1*/*teb1*<sup>+</sup> (C5078), *P*<sub>*cnd3*</sub>-*pob1*/*pob*<sup>+</sup> (C5093), and *P*<sub>*cnd3*</sub>-*SPBC609.01*/*SPBC609.01*<sup>+</sup> (C5103) diploid fission yeast strains imaged after 5 d at 25°C.

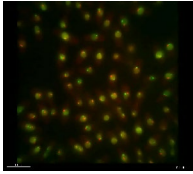

Video 1. **Principle of the chromosome condensation assay.** A z-stack video of a monolayer of *S. pombe* cells carrying red and green FROS labels on one arm of chromosome I was acquired in YE5S medium every 45 s for 1 h. 3D positions of FROS foci were tracked in cells that divided during acquisition. Bar, 10  $\mu$ m.

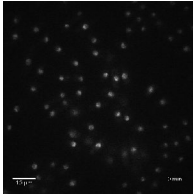

Video 2. **Zasl1-tdTomato localizes to the nucleus throughout the cell cycle.** Live-cell time-lapse recording of haploid cells bearing the Zasl1-tdTomato allele (C5092) in EMM2 medium. Bar, 10  $\mu$ m; frame rate, 1/min.

Provided online are two tables in Excel. Table S1 lists yeast genotypes. Table S2 lists sequences of primers and Zasl1-binding DNA sites.

The supplemental alignment file (TXT file) includes detailed sequence alignments used for the discovery of the TAD motif and the CHD.
